# Supplementary material for: Geometrically controlled organic small molecule acceptors for efficient fullerene-free organic photovoltaic devices
Source: Royal Society of Chemistry journal article supplement (doi:10.1039/c6ta04344e), 2016-01-01
Supplement: c6ta04344e1.pdf [file c6ta04344e1.pdf]

## Electronic Supplementary Information

### Geometrically Controlled Organic Small Molecule Acceptors for Efficient Fullerene-free Organic Photovoltaic Devices

*Wisnu Tanyo Hadmojo,<sup>a</sup> So Youn Nam,<sup>b</sup> Tae Joo Shin,<sup>c</sup> Sung Cheol Yoon,<sup>b</sup> Sung-Yeon Jang,<sup>\*,a</sup> and In Hwan Jung<sup>\*,b</sup>*

- a. Department of Chemistry, Kookmin University, 77 Jeongneung-ro, Seongbuk-gu, Seoul 136-702, South Korea; E-mail: syjang@kookmin.ac.kr*
- b. Advanced Materials Division, Korea Research Institute of Chemical Technology (KRICT), Daejeon 305-600, Republic of Korea; E-mail: ihjung@kRICT.re.kr*
- c. UNIST Central Research Facilities & School of Natural Science, Ulsan National Institute of Science and Technology (UNIST), 50 UNIST-gil, Eonyang-eup, Ulju-gun, Ulsan, 689-798, Republic of Korea*

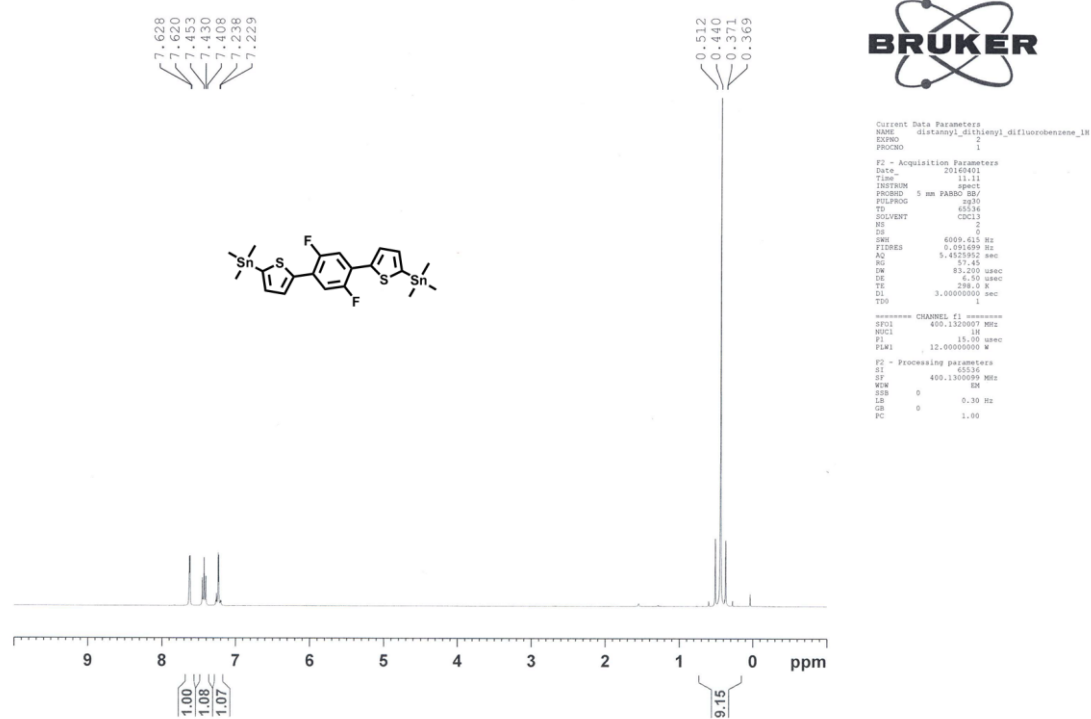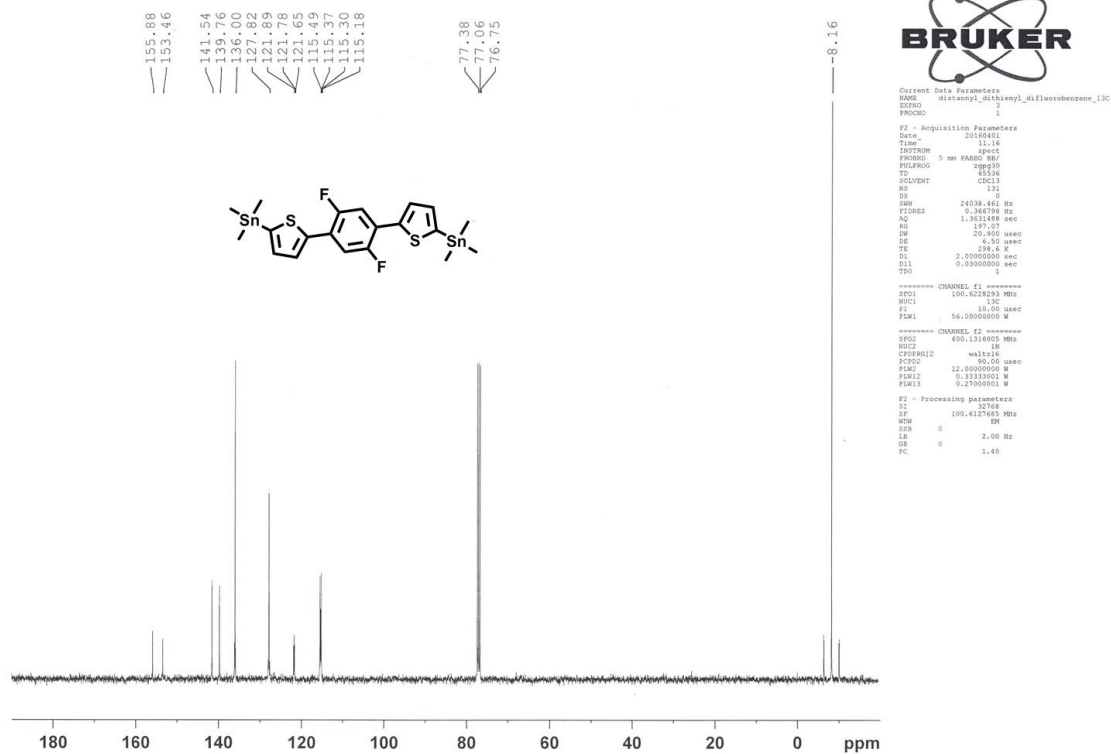

Fig. S1. <sup>1</sup>H and <sup>13</sup>C NMR spectrum of ((2,5-difluoro-1,4-phenylene)bis(thiophene-5,2-diyl))bis(trimethylstannane) (2)

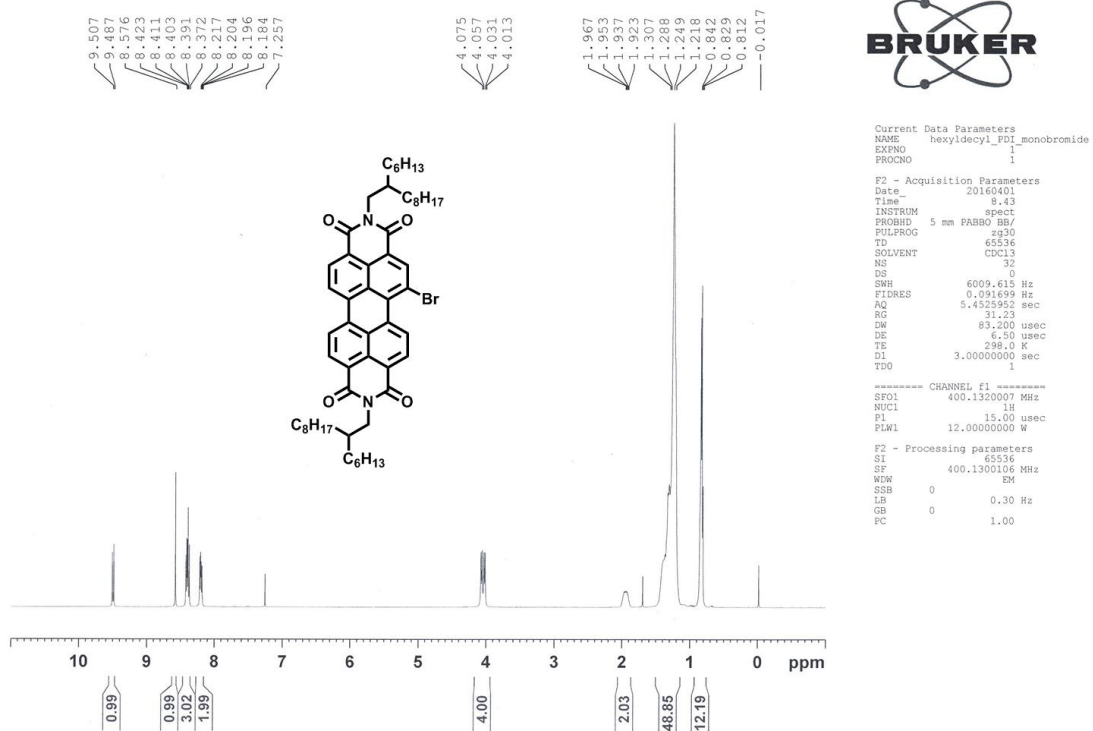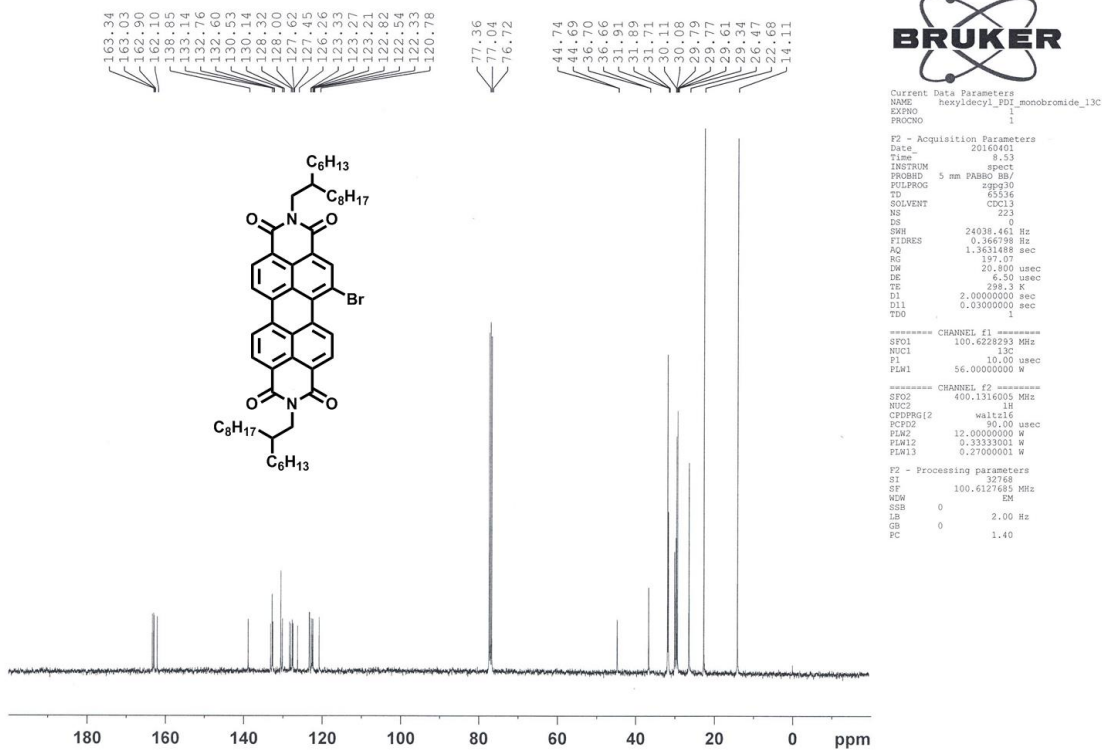

**Fig. S2.** <sup>1</sup>H and <sup>13</sup>C NMR spectrum of 1-bromo-N,N'-bis(2-ethylhexyl)-3,4,9,10-perylene tetracarboxylic diimide (3)

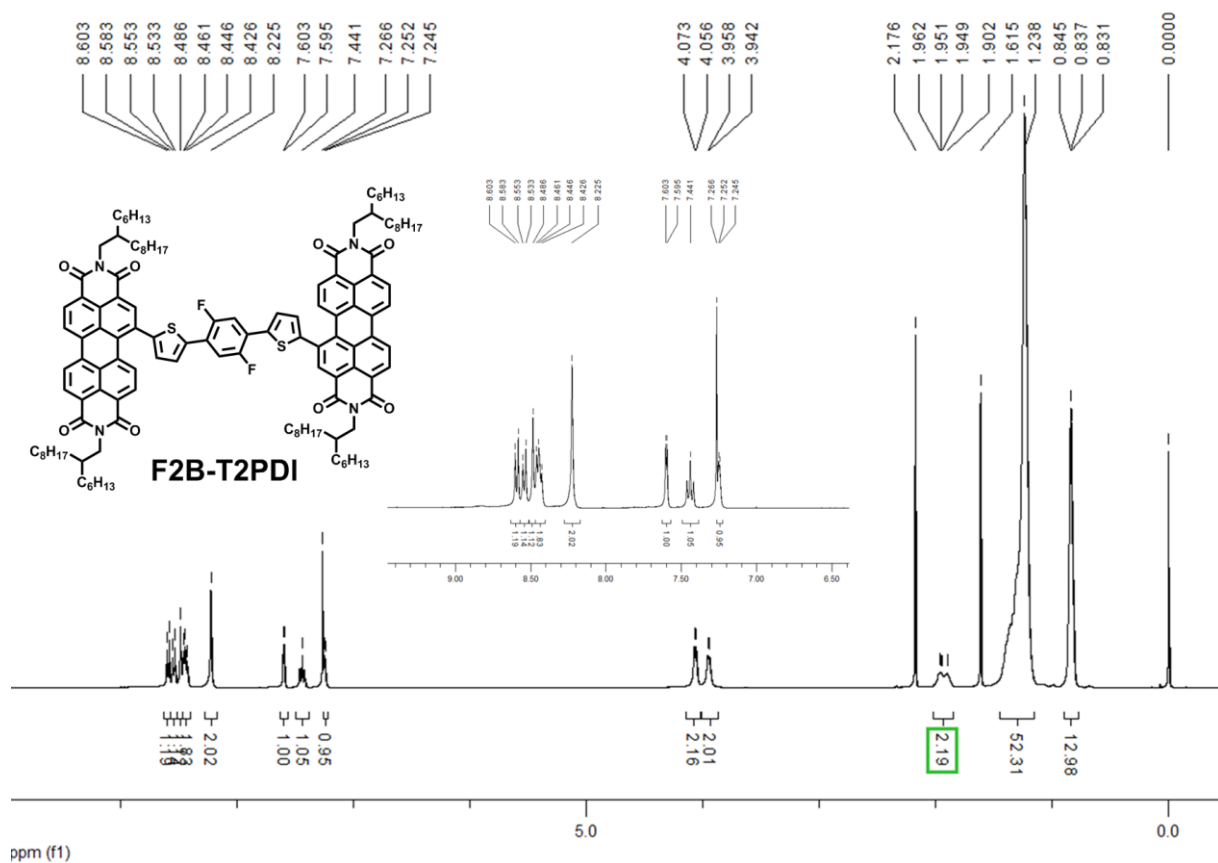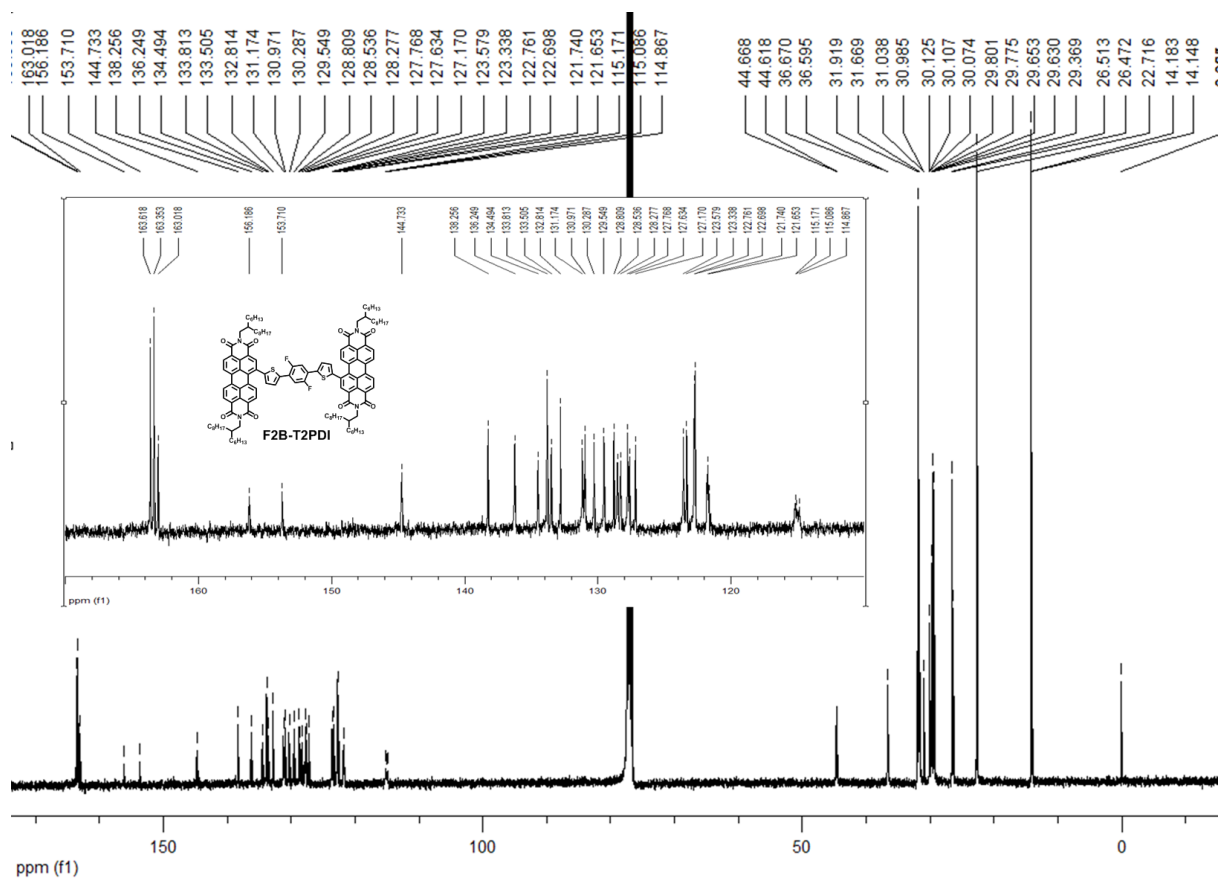

**Fig. S3.** <sup>1</sup>H and <sup>13</sup>C NMR spectrum of F2B-T2PDI

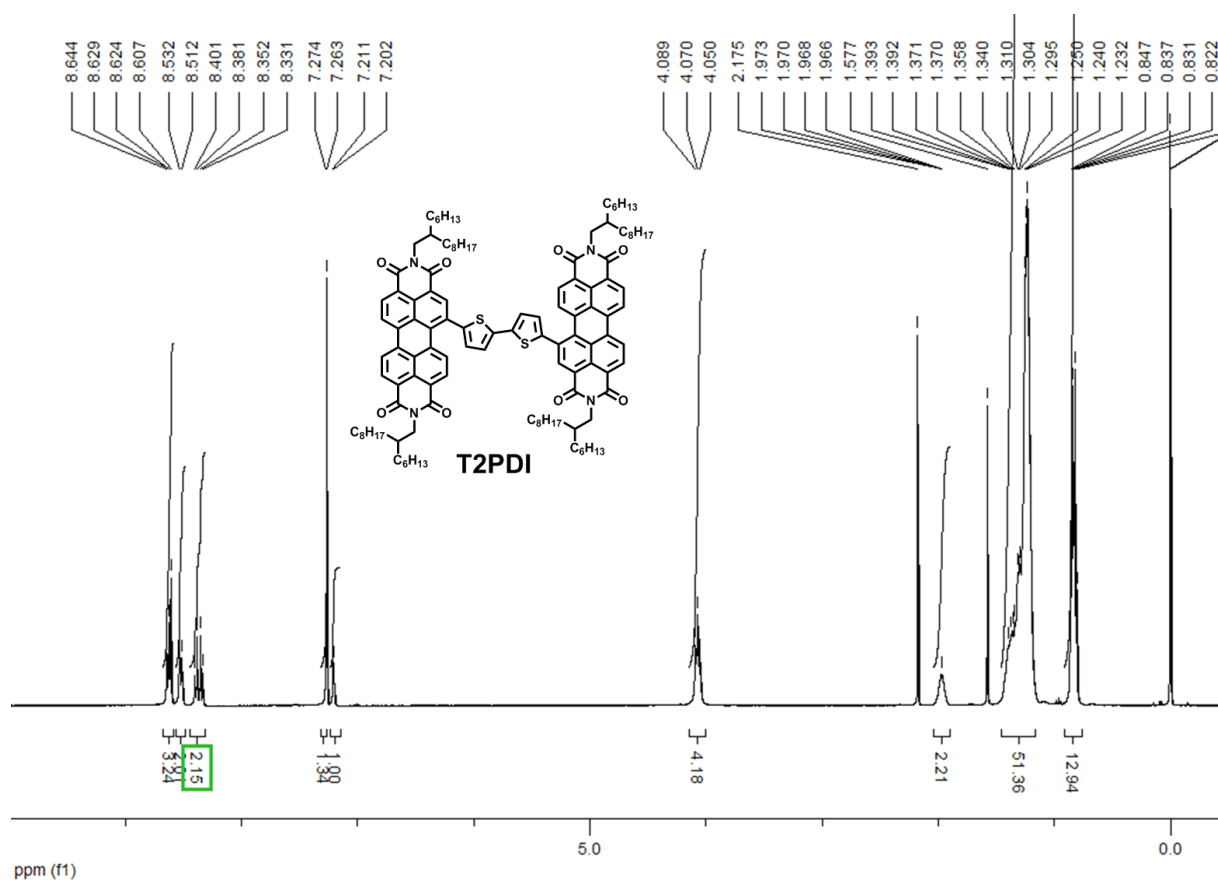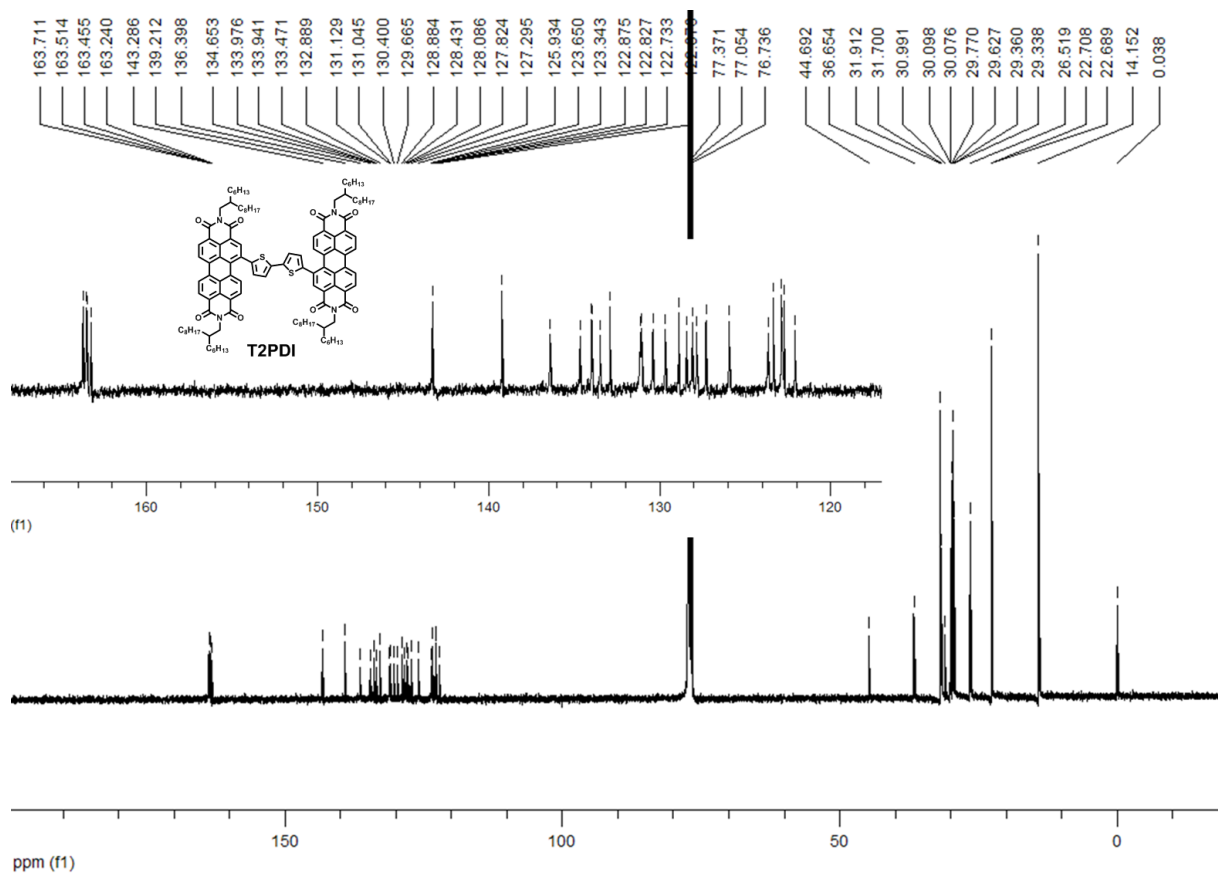

Fig. S4. <sup>1</sup>H and <sup>13</sup>C NMR spectrum of T2PDI

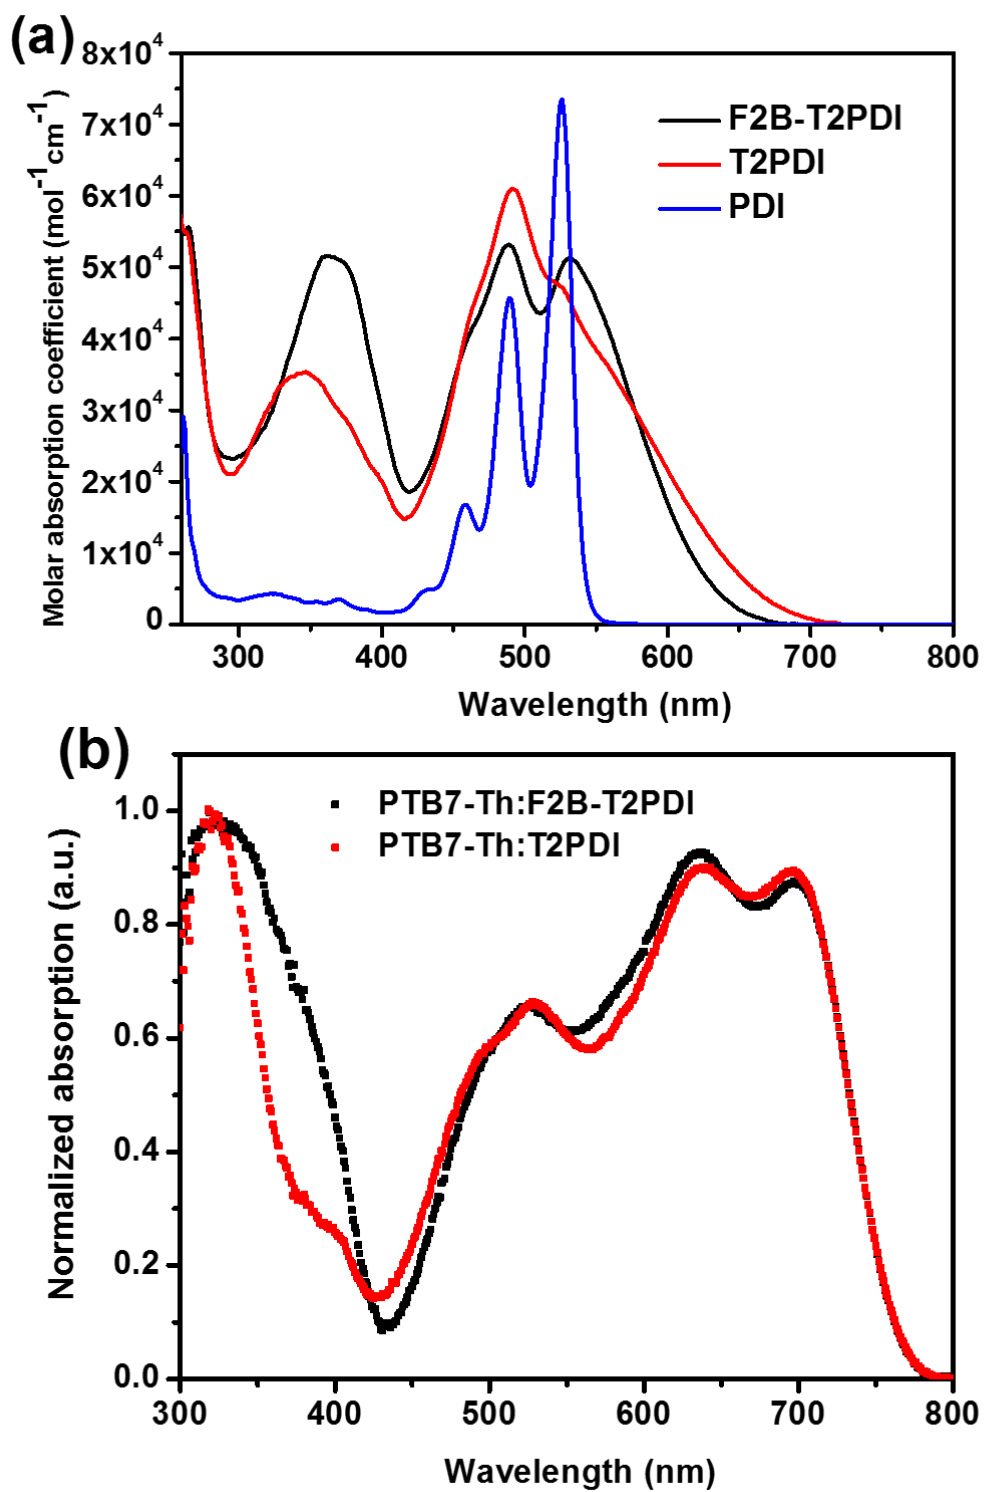

**Fig. S5.** (a) Molar absorption coefficients of F2B-T2PDI, T2PDI acceptors and PDI monomer in chloroform solution and (b) Absorption spectra

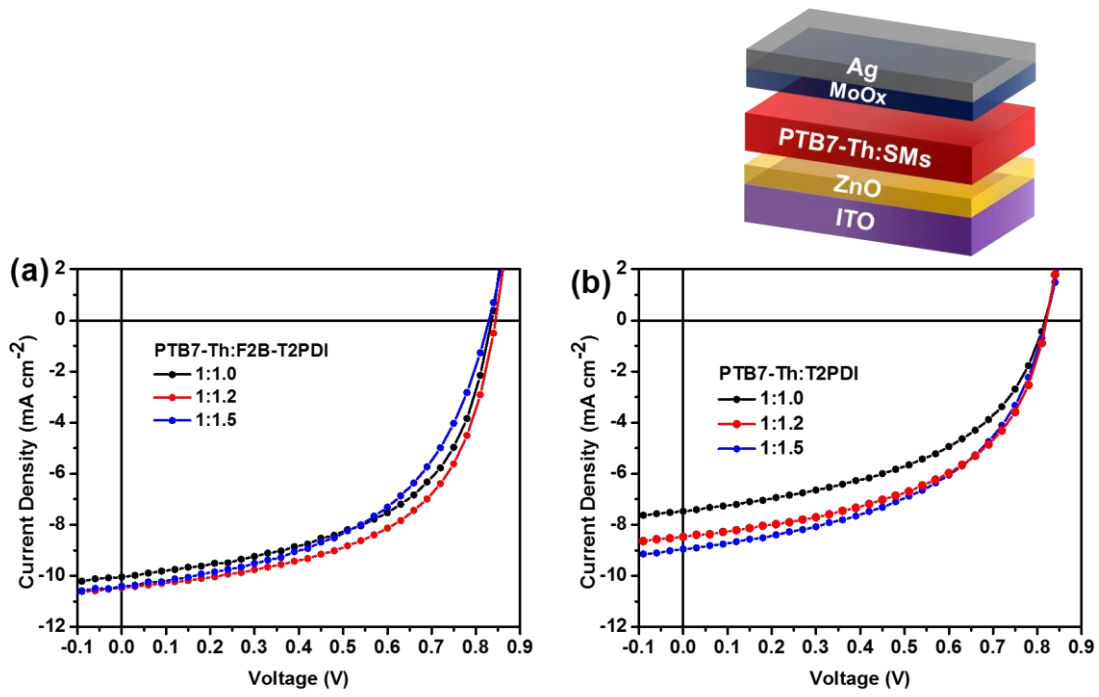

**Fig. S6.** *J*-*V* characteristics of PTB7-Th:F2B-T2PDI (or T2PDI) films at different blend ratio under AM 1.5G illumination.

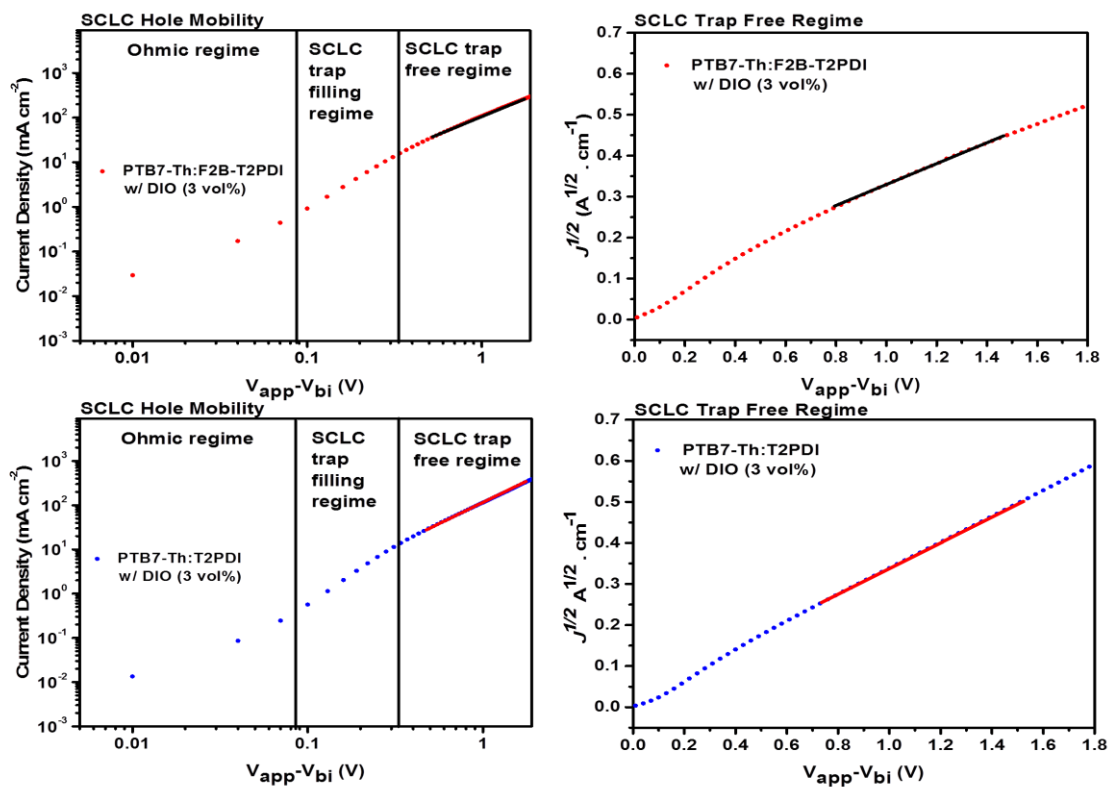

**Fig. S7.**  $J$ - $V$  characteristics of the hole-only devices using PTB7-Th:SM acceptor blend films.

The charge mobilities were calculated by fitting the  $J$ - $V$  curves in the SCLC regime.



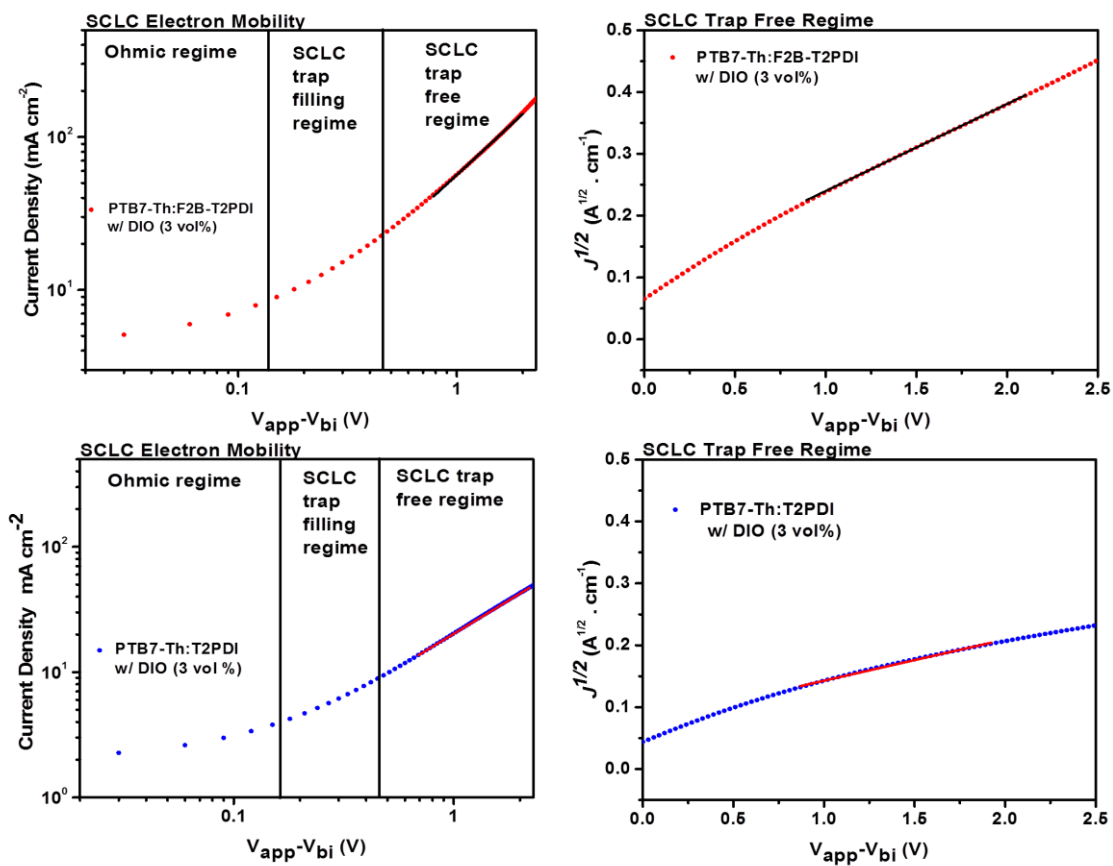

**Fig. S8.**  $J$ - $V$  characteristics of the electron-only devices using PTB7-Th:SM acceptor blend films. The charge mobilities were calculated by fitting the  $J$ - $V$  curves in the SCLC regime.

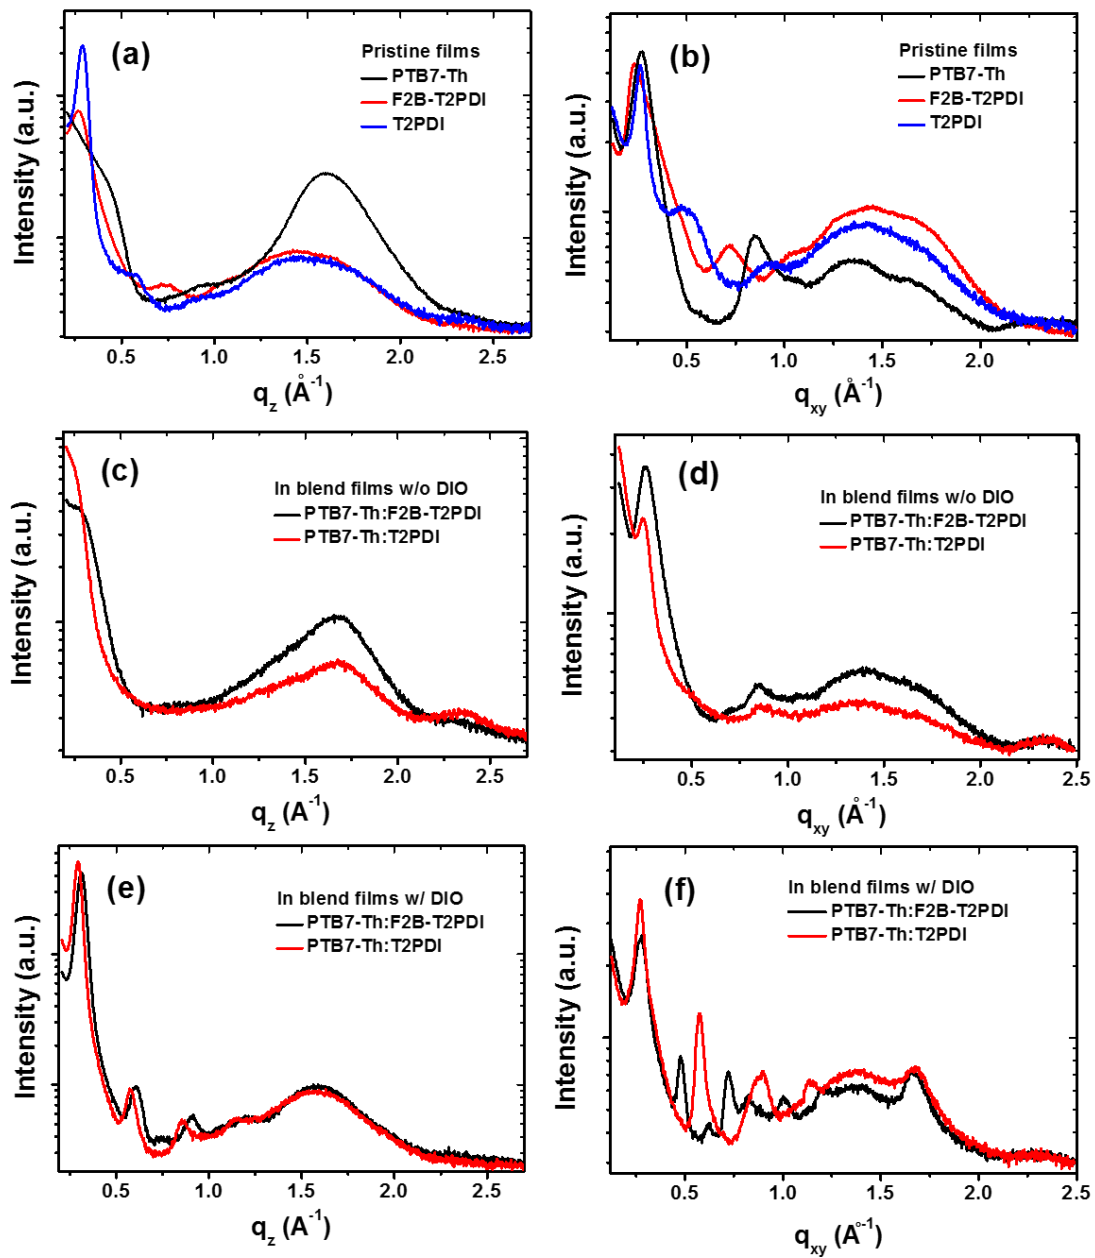

Fig. S9. Out-of-plane and in-plane line cuts from 2D-GIXRD results of neat and blend films.

**Table S1.** Summary of photovoltaic properties in Figure S6.

| PTB7-<br>Th:acceptor | blend ratio | $J_{sc}$<br>(mA cm <sup>-2</sup> ) | $V_{oc}$ (V) | Fill factor | PCE <sub>max</sub> (ave)<br>[%] |
|----------------------|-------------|------------------------------------|--------------|-------------|---------------------------------|
| F2B-T2PDI            | 1.0 : 1.0   | 0.83                               | 9.96         | 0.53        | 4.36 (4.26)                     |
| F2B-T2PDI            | 1.0 : 1.2   | 0.84                               | 10.60        | 0.57        | 5.05 (4.79)                     |
| F2B-T2PDI            | 1.0 : 1.5   | 0.84                               | 10.58        | 0.56        | 4.99 (4.70)                     |
| T2PDI                | 1.0 : 1.0   | 0.82                               | 7.47         | 0.49        | 2.98 (2.91)                     |
| T2PDI                | 1.0 : 1.2   | 0.82                               | 8.48         | 0.52        | 3.59 (3.53)                     |
| T2PDI                | 1.0 : 1.5   | 0.82                               | 8.95         | 0.49        | 3.63 (3.57)                     |
